# Supplementary material for: Phosphorus adsorption by a modified polyampholyte-diatomaceous earth material containing imidazole and carboxylic acid moieties: batch and dynamic studies
Source: Royal Society of Chemistry journal article supplement (doi:10.1039/c6nj04031d), 2017-01-01
Supplement: c6nj04031d1.pdf [file c6nj04031d1.pdf]

### Electronic supporting information

Phosphorus adsorption by a modified polyampholyte-diatomaceous earth material containing imidazole and carboxylic acid moieties: batch and dynamic studies. †

María Emilia Villanueva<sup>a,b</sup>, Ana María del Rosario Diez<sup>a,b</sup>, Joaquín Antonio González<sup>a,b</sup>, Juan Manuel Lázaro-Martínez<sup>c,d</sup>, Viviana Campo Dall'Orto<sup>a,d\*</sup> and Guillermo Javier Copello<sup>a,b\*</sup>

a

Universidad de Buenos Aires (UBA), Facultad de Farmacia y Bioquímica, Departamento de Química Analítica y Fisicoquímica, Junín 956, C1113AAD Buenos Aires, Argentina;

b

Instituto de Química y Metabolismo del Fármaco, Fac. de Farmacia y Bioquímica, (IQUIMEFA-UBA-CONICET);

c

Universidad de Buenos Aires (UBA), Facultad de Farmacia y Bioquímica, Departamento de Química Orgánica, Junín 956, C1113AAD Buenos Aires, Argentina;

d

IQUIFIB-CONICET. Junín, 956 (1113) CABA, Argentina

**Corresponding authors:** Química Analítica and Química Analítica Instrumental, FFyB, UBA, Junín 956 - Piso 3 (C1113AAD), CABA, Argentina. Tel.: +54 11 49648254; fax: +54 11 49648254. E-mail: [vc dall@ffyb.uba.ar](mailto:vc dall@ffyb.uba.ar); [gcopello@ffyb.uba.ar](mailto:gcopello@ffyb.uba.ar)

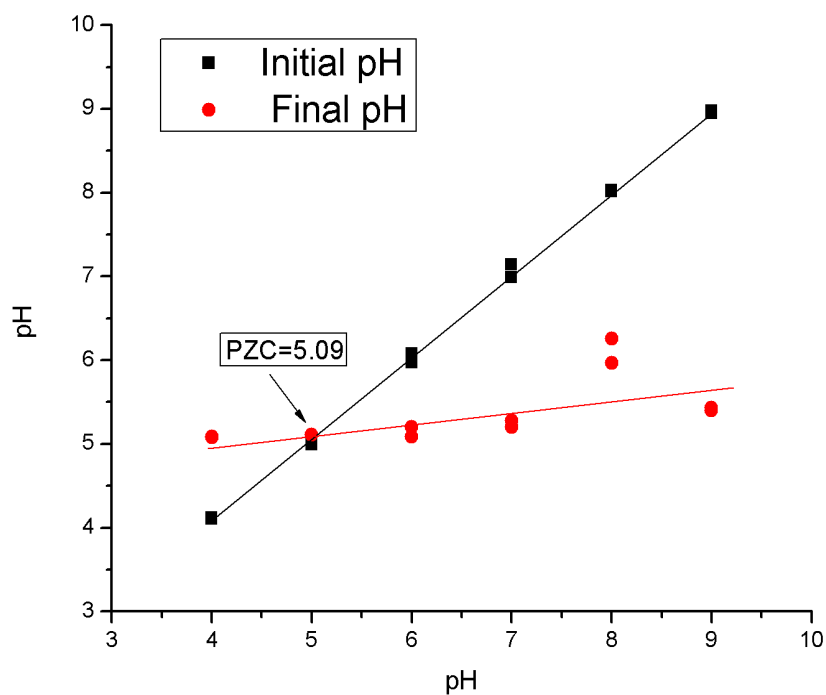

**ESI 1.** Final pH vs initial pH of the polyampholyte – DE mixture.

**ESI 2.** FTIR assignments for the FT-IR spectra depicted in Figure 2

|                                                            | Wavenumber (cm <sup>-1</sup> ) |                                       |                                       |                                       |                                       |
|------------------------------------------------------------|--------------------------------|---------------------------------------|---------------------------------------|---------------------------------------|---------------------------------------|
|                                                            | A                              | B                                     | C                                     | D                                     | E                                     |
| $\nu_{\text{CH}}$                                          |                                | 1275,1370                             | 1275,1370                             | 1275,1343, 1400                       | 1275,1343, 1400                       |
| <b>C-O-C</b>                                               |                                | 1077                                  | 1077                                  | 1077                                  | 1077                                  |
| $\nu_{\text{C=C}}$ and $\nu_{\text{C=N}}$                  |                                | 628, 721, 838, 921,<br>1450,1560,1638 |
| $\nu_{\text{Si-O-Si}}$<br>(asymmetric stretching in plane) | 1070                           |                                       |                                       |                                       |                                       |
| $\nu_{\text{Si-OH}}$                                       | 791                            |                                       |                                       |                                       |                                       |
| <b>Si-O</b><br>deformation / <b>Al-O</b> stretching        | 615                            |                                       |                                       |                                       |                                       |
| $\nu_{\text{C=O}}$                                         |                                | 1715                                  | 1715                                  | 1715                                  | 1715                                  |
| -CO2-                                                      |                                | 1560                                  | 1715                                  | 1715                                  | 1715                                  |

**A:** DE, **B:** polyampholyte, **C:** polyampholyte - DE mixture, **D:** polyampholyte - DE mixture after exposure to a P solution at pH 5 and **E:** polyampholyte - DE mixture after exposure to a P solution at pH 7

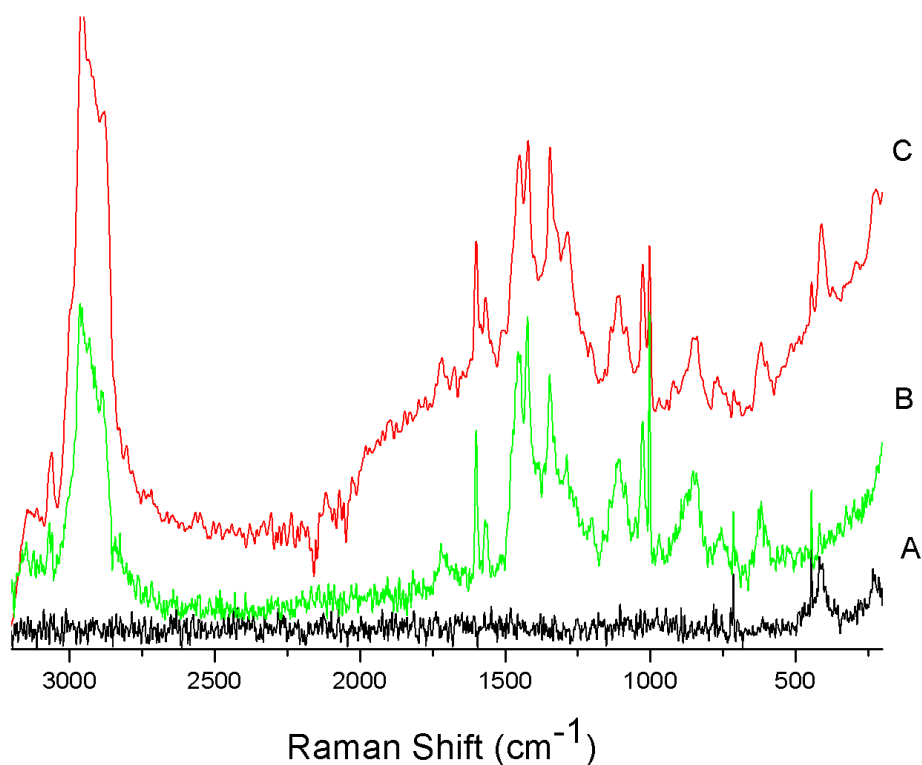

**ESI 3.** FT - Raman spectra of **A:** DE, **B:** polyampholyte, **C:** polyampholyte - DE mixture.

**ESI 4.** Raman assignments for the Raman spectra depicted in Figure 3

|                                           | Raman Shift (cm <sup>-1</sup> ) |                     |                     |
|-------------------------------------------|---------------------------------|---------------------|---------------------|
|                                           | A                               | B                   | C                   |
| $\nu_{\text{CH}}$                         |                                 | 2957 - 2887         | 2957 - 2887         |
| <b>C-O-C</b>                              |                                 | 1027                | 1027                |
| $\nu_{\text{C=C}}$ and $\nu_{\text{C=N}}$ |                                 | 1109 - 1080         | 1109 - 1080         |
| Amorphous Si-O bonds                      | 406                             |                     | 406                 |
| $\nu_{\text{C=O}}$                        |                                 | 1604                | 1604                |
| $\nu_{\text{C-C}}$                        |                                 | 1003- 851- 753 -631 | 1003- 851- 753 -631 |
| $\nu_{\text{(C-N)}}$                      |                                 | 1109                | 1109                |
| Hetero ring                               |                                 | 1571                | 1571                |
| $\text{CH}_2$                             |                                 | 1428 - 1456         | 1428 - 1456         |

**A:** DE **B:** Polyampholyte **C:** Polyampholyte – DE.  $\nu$ , stretching

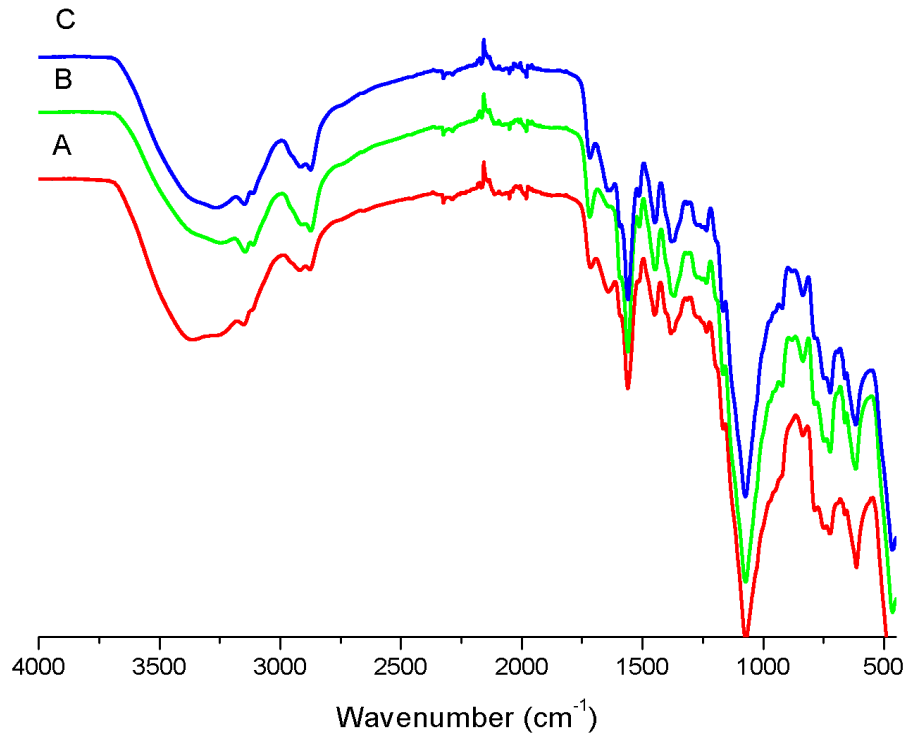

**ESI 5** FT-IR spectra of A: polyampholyte - DE mixture exposed at 25 °C, B: polyampholyte - DE mixture exposed at 37 °C and C: polyampholyte - DE mixture exposed at 40 °C.

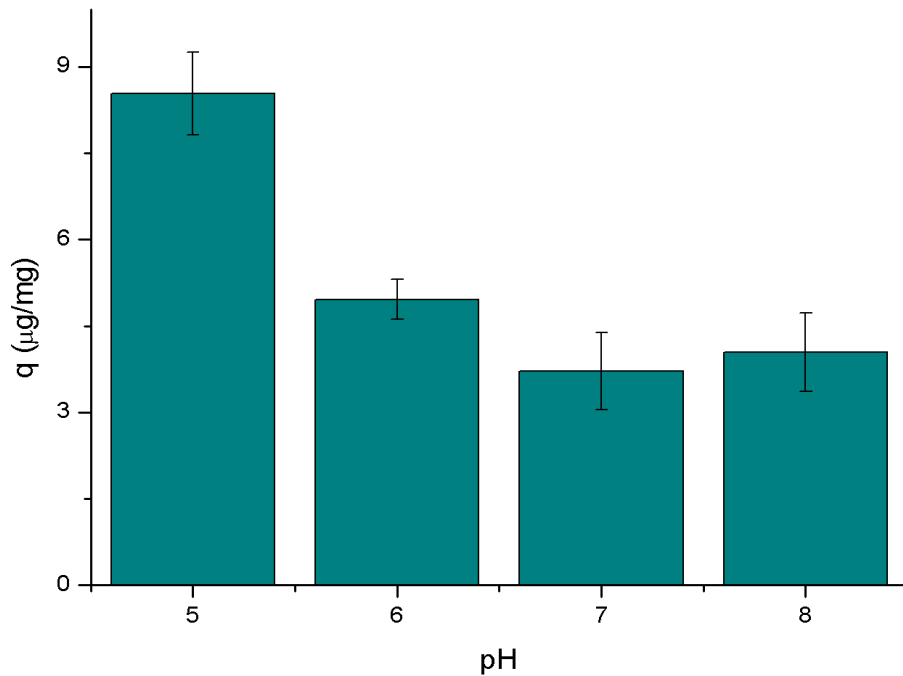

**ESI 6.** Adsorption capacity vs pH

## Isotherm adsorption models

Langmuir and Freundlich models have been widely applied to the adjustment of biosorption equilibrium data. The former assumes that a sorbate interacts homogeneously, at homogeneous sorption sites, until a monolayer is formed in the sorbent surface. On the other hand, Freundlich model have proved to describe better the adjustment of sorbents with heterogeneous adsorption sites and dissimilar interactions.<sup>31</sup> Langmuir and Freundlich adsorption isotherms can be expressed using equations (1) and (2) respectively.<sup>32</sup>

$$q_{eq} = \frac{q_m \cdot K_a \cdot C_{eq}}{1 + K_a \cdot C_{eq}} \quad (1)$$

$$q_{eq} = k \cdot C_{eq}^n \quad (2)$$

where  $K_a$  is the adsorption equilibrium constant (L/mg),  $q_m$  is the maximum adsorption capacity (mg/g) and  $k$  and  $n$  are arbitrary parameters. The dimension of  $k$  depends on the value of  $n$ .

The non-linear Sips isotherm equation predicts a monolayer sorption capacity characteristic of the Langmuir isotherm at high sorbate concentrations.<sup>33</sup> On the other hand, at low sorbate concentrations it exhibits a departure from Henry's law such as Freundlich isotherm. It can be represented as:

$$q_{eq} = \frac{q_m (a_s C)^{n_s}}{1 + (a_s C)^{n_s}}$$

If the value of  $n_s$  is equal to 1 then this expression turns to be a Langmuir equation, where  $a_s$  is the adsorption equilibrium constant. Alternatively, as either  $C$  or  $a_s$  approaches 0, this isotherm reduces to the Freundlich isotherm.

The Redlich-Peterson isotherm (R-P) incorporates features of both the Langmuir and Freundlich equations: at low concentrations the R-P isotherm approximates to Henry's law and at high concentrations its behaviour approaches that of the Freundlich isotherm.<sup>33</sup>

$$q_e = \frac{K_r C}{1 + a_R C^{n_R}}$$

When the value of  $n_R$  is equal to 1, the above equation is reduced to the Langmuir Model with their heterogeneity parameters ( $n_s$  and  $n_{rp}$ ) close to a value of 1, while it reduced to a Freundlich isotherm in case the value of  $a_R C^{n_R}$  is much bigger than 1. The ratio of  $K_R/a_R$  indicates the adsorption capacity.

## Dynamic adsorption model

## Thomas model

The Thomas model is another one frequently applied to estimate the adsorptive capacity of adsorbent and predict breakthrough curves, assuming the second-order reversible reaction kinetics and the Langmuir isotherm. Theoretically, it is suitable to estimate the adsorption process where external and internal diffusion resistances are extremely small.<sup>34</sup> The Thomas model is given by Equation 3

$$\frac{C_t}{C_0} = \frac{1}{e^{\left(\frac{k_{Th}}{Q} \cdot (q_0 \cdot m) - (C_0 \cdot Q \cdot t)\right)}} \quad (3)$$

where  $k_{Th}$  is the Thomas rate constant,  $m$  is the mass of adsorbent in the column,  $Q$  is the flow rate,  $q_0$  is the adsorption capacity of the column.
